# Supplementary material for: Enhanced electrochemical performance of Li3V2(PO4)3/Ag–graphene composites as cathode materials for Li-ion batteries
Source: Royal Society of Chemistry journal article supplement (doi:10.1039/c4ta00031e), 2014-01-01
Supplement: c4ta00031e1.pdf [file c4ta00031e1.pdf]

## Supporting Information

### The Enhanced electrochemical performances of $\text{Li}_3\text{V}_2(\text{PO}_4)_3/\text{Ag}$ +grapheme composites as cathode materials for Li-ion batteries

Mansoo Choi<sup>a,b</sup>, Hyun-Soo Kim<sup>a</sup>, Young Moo Lee<sup>b</sup>, and Bong-Soo Jin<sup>a\*</sup>

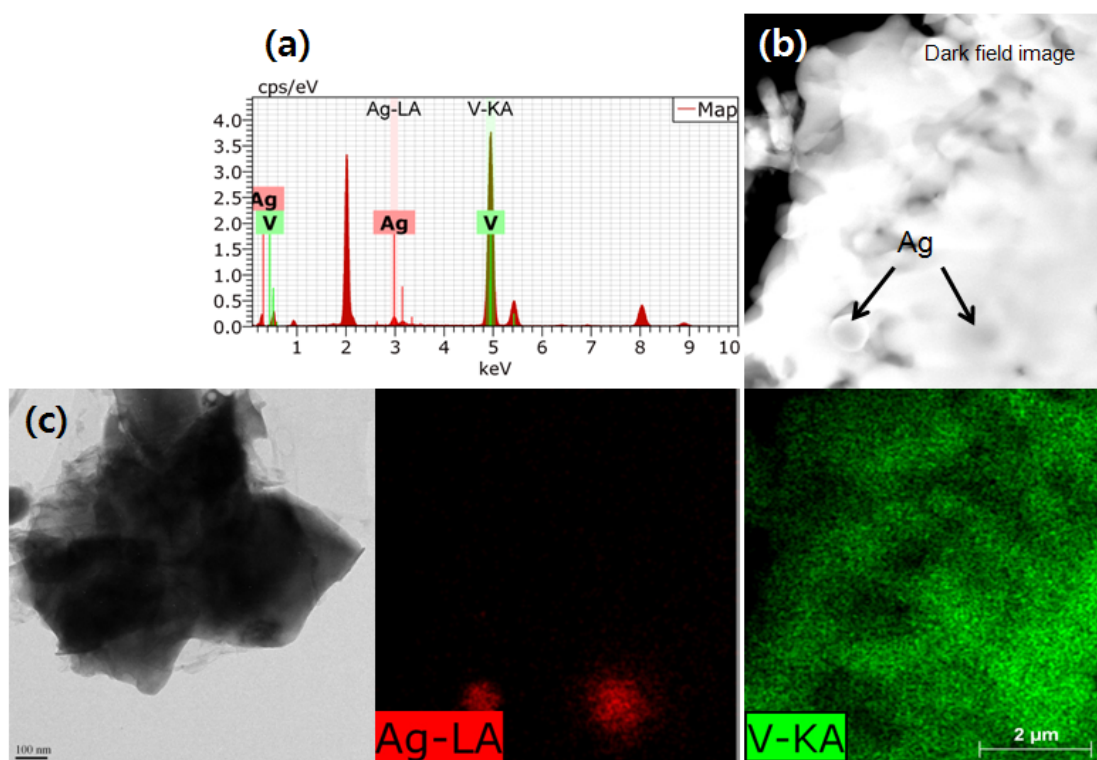

**Figure S1.** EDS spectrum of LVP/Ag (a), dark-field (DF) image(b), TEM image of LVP/Ag+G and elemental mapping images of LVP/Ag composite and the elemental distributions

Fig. S1 showed the dark field image and the corresponding elemental mapping images of V and Ag. The image revealed that Ag particles are embedded in the LVP composite
